# Supplementary material for: Cardiac Rehabilitation in German Speaking Countries of Europe—Evidence-Based Guidelines from Germany, Austria and Switzerland LLKardReha-DACH—Part 1
Source: MDPI journal article supplement (doi:10.3390/jcm10102192), 2021-05-19
Supplement: s1 [file s1]

# Supplemental Material

## Data S1. Content of LL-KardReha-DACH in its original form in German language

| Table S1: LL-KardReha-DACH: Content and levels of evidence generation |                                                                                                                                                                                                                                                                                                                                                                                                                                                                                                                                                                                                                                                                                                                                                                                                                      |
|-----------------------------------------------------------------------|----------------------------------------------------------------------------------------------------------------------------------------------------------------------------------------------------------------------------------------------------------------------------------------------------------------------------------------------------------------------------------------------------------------------------------------------------------------------------------------------------------------------------------------------------------------------------------------------------------------------------------------------------------------------------------------------------------------------------------------------------------------------------------------------------------------------|
| 1. General information                                                | <ul style="list-style-type: none"> <li>- Initiation of the guideline and responsibilities</li> <li>- Development, methods and internal reviewing processes</li> </ul>                                                                                                                                                                                                                                                                                                                                                                                                                                                                                                                                                                                                                                                |
| 2. Introduction                                                       | <ul style="list-style-type: none"> <li>- Aims of cardiac rehabilitation</li> <li>- Definition of cardiac rehabilitation</li> <li>- Legal regulations and CR-structures in Germany, Austria and Switzerland</li> </ul>                                                                                                                                                                                                                                                                                                                                                                                                                                                                                                                                                                                                |
| 3. General objectives of CR                                           | <ul style="list-style-type: none"> <li>- Goals and conflicting goals (NER)</li> <li>- Cardiovascular prevention (NER)</li> <li>- Psychosocial goals and tasks (NER)</li> <li>- Social and vocational reintegration of patients (NER)</li> </ul>                                                                                                                                                                                                                                                                                                                                                                                                                                                                                                                                                                      |
| 4. Indications for CR initiation and participation                    | <ul style="list-style-type: none"> <li>- <b>after acute coronary syndrome (S3)</b></li> <li>- <b>after coronary bypass surgery (S3)</b></li> <li>- with chronic coronary syndrome (S2k)</li> <li>- with high CV-risk (S2k)</li> <li>- <b>with chronic heart failure (S3)</b></li> <li>- after surgical or interventional valve repair (S2k)</li> <li>- after ICD/CRT implantation (S2k)</li> <li>- with ventricular assist device (S2k)</li> <li>- after heart transplantation (S2k)</li> <li>- after surgical/interventional repair of the aorta (S2k)</li> <li>- with chronic peripheral arterial disease (S2k)</li> <li>- after pulmonary embolism (S2k)</li> <li>- with chronic pulmonary hypertension (S2k)</li> <li>- after myocarditis (S2k)</li> <li>- adults with congenital heart disease (S2k)</li> </ul> |
| 5. CR-specific contents and interventions                             | <ul style="list-style-type: none"> <li>- Medical supervision and nursing (S2k)</li> <li>- Physical exercise modalities as adapted to the individually underlying cardiovascular diseases (S2k)</li> <li>- <b>Psychological interventions (S3)</b></li> <li>- Smoking cessation (S2k)</li> <li>- Nutrition (S2k)</li> <li>- Ergotherapy (S2k)</li> <li>- Social interventions (S2k)</li> <li>- Information, education and training for lifestyle changes (S2k)</li> </ul>                                                                                                                                                                                                                                                                                                                                             |

|                                                                                                                                                                                                                                                                                                                                                                                      |                                                                                                                                                                                                                                                                                                                                                                                                                |
|--------------------------------------------------------------------------------------------------------------------------------------------------------------------------------------------------------------------------------------------------------------------------------------------------------------------------------------------------------------------------------------|----------------------------------------------------------------------------------------------------------------------------------------------------------------------------------------------------------------------------------------------------------------------------------------------------------------------------------------------------------------------------------------------------------------|
| 6. CV risk diseases and co-morbidities                                                                                                                                                                                                                                                                                                                                               | <ul style="list-style-type: none"> <li>- Hypertension (NER)</li> <li>- Hyperlipidemia (NER)</li> <li>- Diabetes and metabolic syndrome (NER)</li> <li>- Adipositas (NER)</li> <li>- Chronic renal disease (NER)</li> <li>- Chronic obstructive lung disease (NER)</li> <li>- Orthopaedic disorders (NER)</li> <li>- Rheumatic diseases (NER)</li> <li>- Psychiatric and neurological diseases (NER)</li> </ul> |
| 7. Special groups of patients in CR                                                                                                                                                                                                                                                                                                                                                  | <ul style="list-style-type: none"> <li>- Old and frail patients (S2k)</li> <li>- Young patients (S2k)</li> <li>- Gender specialities (S2k)</li> <li>- Migrants (S2k)</li> </ul>                                                                                                                                                                                                                                |
| 8. Medical aftercare, prevention programs                                                                                                                                                                                                                                                                                                                                            | <ul style="list-style-type: none"> <li>- Phase 3 programs (S2k)</li> <li>- Integrated ambulatory health care and disease management programs (S2k)</li> </ul>                                                                                                                                                                                                                                                  |
| 9. Special concepts                                                                                                                                                                                                                                                                                                                                                                  | <ul style="list-style-type: none"> <li>- Work related prevention programs (S2k)</li> <li>- Work related rehabilitation programs (S2k)</li> <li>- Tele-rehabilitation and home-based rehabilitation (S2k)</li> </ul>                                                                                                                                                                                            |
| 10.                                                                                                                                                                                                                                                                                                                                                                                  | - Evidence – based quality assurance in CR (S2k)                                                                                                                                                                                                                                                                                                                                                               |
| <p><b>S3</b> = highest level of scientific evidence based on newly performed structured reviews and meta-analyses;<br/> <b>S2k</b> = medium level of scientific evidence based on semi-structured literature searches and evaluation without performing meta-analyses; <b>NER</b> = Narrative evidence reporting based on the most actual topic-related international guidelines</p> |                                                                                                                                                                                                                                                                                                                                                                                                                |

## Data S2. Classification of scientific evidence according to SIGN

Ref.: Scottish Intercollegiate Guidelines Network, SIGN 50, "A guideline developer's handbook". <https://www.sign.ac.uk/pdf/sign50.pdf>

### LEVELS OF EVIDENCE

**1 ++** High quality meta-analyses, systematic reviews of RCTs or RCTs with a very low risk of bias

**1 +** Well conducted meta-analyses, systematic reviews or RCTs with a low risk of bias

**1 -** Meta-analyses, systematic reviews or RCTs with a high risk of bias

- 2 ++ High quality systematic reviews of case control or cohort studies. High quality case control or cohort studies with a very low risk of confounding or bias and a high probability that the relationship is causal
- 2 + Well conducted case control or cohort studies with a low risk of confounding or bias and a moderate probability that the relationship is causal
- 2 - Case control or cohort studies with a high risk of confounding or bias and a significant risk that the relationship is not causal
- 3 Non-analytic studies, e.g. case reports, case series
- 4 Expert opinion
